# Supplementary material for: Sterol regulatory element binding protein 1 couples mechanical cues and lipid metabolism
Source: PubMed Central journal article supplement (PMC6430766; doi:10.1038/s41467-019-09152-7), 2019-03-22
Supplement: 41467_2019_9152_MOESM1_ESM.pdf [file 41467_2019_9152_MOESM1_ESM.pdf]

## **Supplementary Information**

### **Sterol Regulatory Element Binding Protein 1 couples mechanical cues and lipid metabolism**

Bertolio et al.

## Supplementary figures

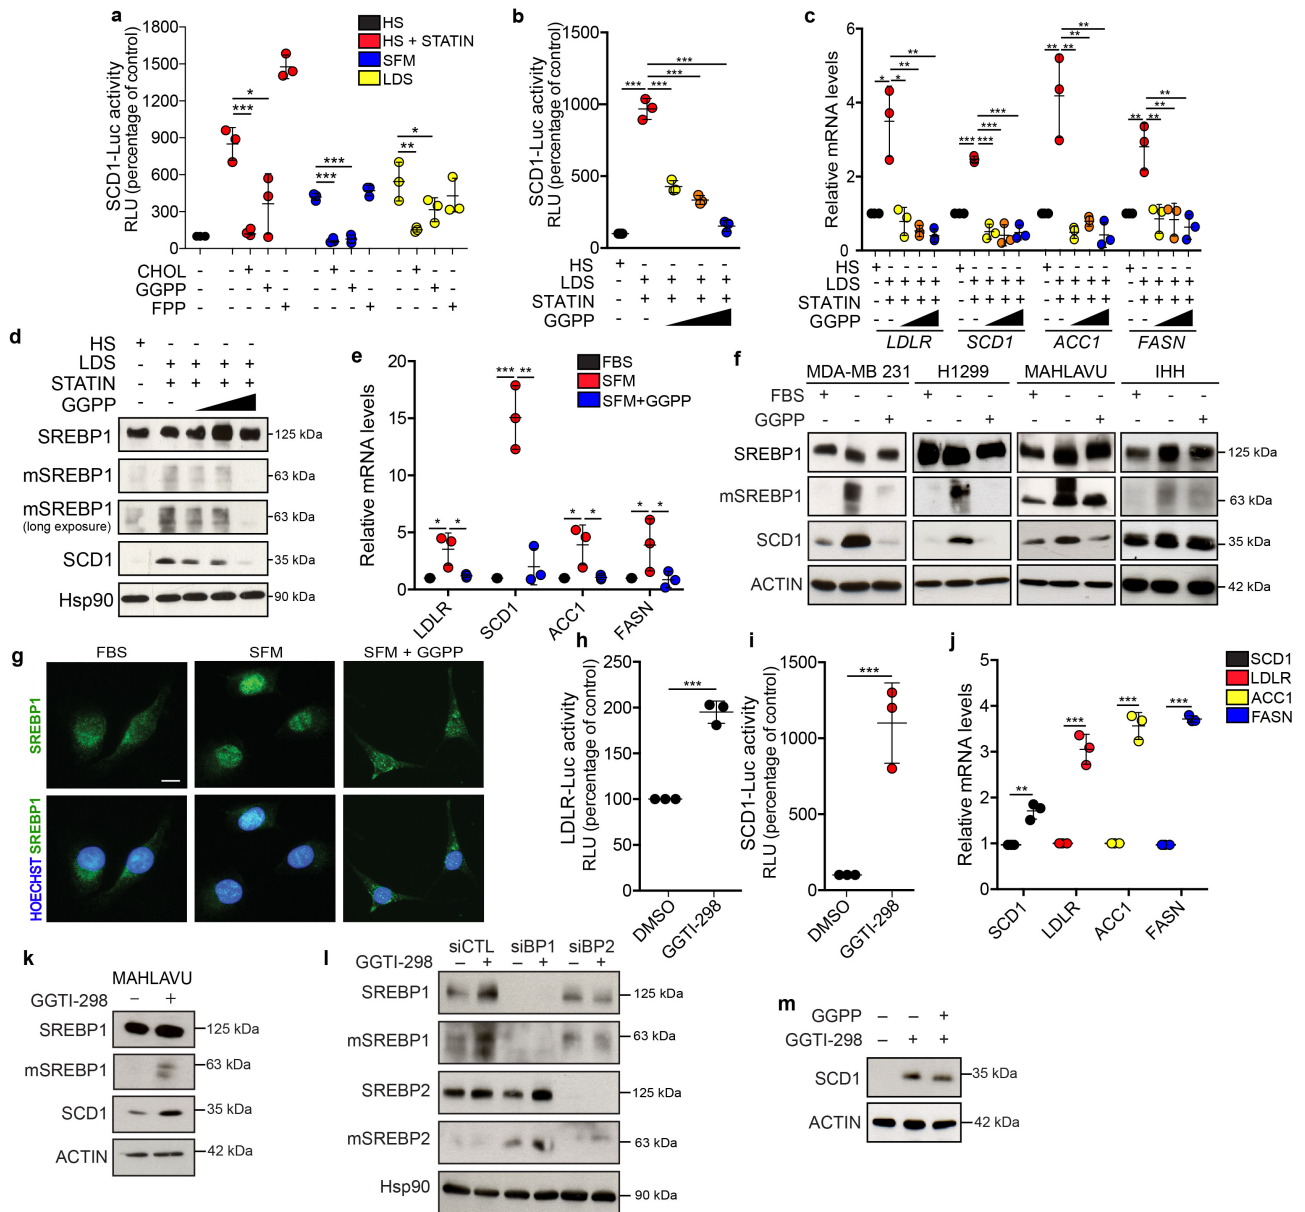

**Supplementary Fig. 1** | **a**, SCD1-Luc assay in MCF-10A cells treated with cholesterol (CHOL), geranylgeranyl (GGPP) or farnesyl pyrophosphate (FPP). 5% horse serum (HS) medium (control) was supplemented with 10  $\mu$ M cerivastatin (STATIN), replaced with serum-free (SFM), or 2% lipid serum (lipid-depleted serum, LDS) medium. **b-d**, SCD1-Luc assay (**b**), *LDLR*, *SCD1*, *ACC1* and *FASN* RT-qPCR (**c**) SREBP1 and SCD1 western blot (**d**) in MCF-10A cells. 5% HS medium (control) was replaced with 2% LDS medium supplemented with 1  $\mu$ M cerivastatin (STATIN) and 20, 40, 100  $\mu$ M GGPP. **e**, *LDLR*, *SCD1*, *ACC1* and *FASN* RT-qPCR in IHH cells. 5% HS medium (control) was replaced with SFM or SFM supplemented with GGPP. **f**, SREBP1 and SCD1 western blot in MDA-MB 231,

H1299, Mahlavu and IHH cells cultured in 10% foetal bovine serum (FBS) medium, SFM, or SFM supplemented with GGPP. **g**, SREBP1 Immunofluorescence (green) in MDA-MB 231 cells cultured in 10% FBS medium, SFM, or SFM supplemented with GGPP. Nuclei were stained with HOECHST (in blue). Scale bar 15  $\mu$ m. **h** LDLR-Luc assay in IHH cells treated with DMSO (control) or geranylgeranyl transferase I inhibitor (GGTI-298). **i**, SCD1-Luc assay in MCF-10A cells treated with DMSO (control) or 5 $\mu$ M GGTI-298. **j**, *LDLR*, *SCD1*, *ACC1* and *FASN* RT-qPCR in IHH cells treated with DMSO (control) or 5 $\mu$ M GGTI-298. **k**, Western blot analysis of Mahlavu cells treated with DMSO (control) or 5 $\mu$ M GGTI-298. **l**, Western blot analysis of MCF-10A cells transfected with control (siCTL), SREBP1 (siBP1) or SREBP2 (siBP2) siRNA and treated with GGTI-298. **m**, Western blot analysis of MCF-10A cells treated with DMSO, GGTI-298 or GGTI-298 and GGPP.

Graph bars represent mean  $\pm$  s.d. of n=3 biological replicates. Treatments lasted 24 hours Values in **a**, **b**, **h** are expressed as Relative Luminometer Units (RLU). RT-qPCR values are expressed as mRNA levels relative to control. P value: \*P < 0.05, \*\*P < 0.01, \*\*\*P < 0.001 by two-tailed Student's t –test for all the analyses. Blots are representative of n=3 biological replicates. For western blots, mSREBP indicates mature protein, Actin and Hsp90 were loading controls.

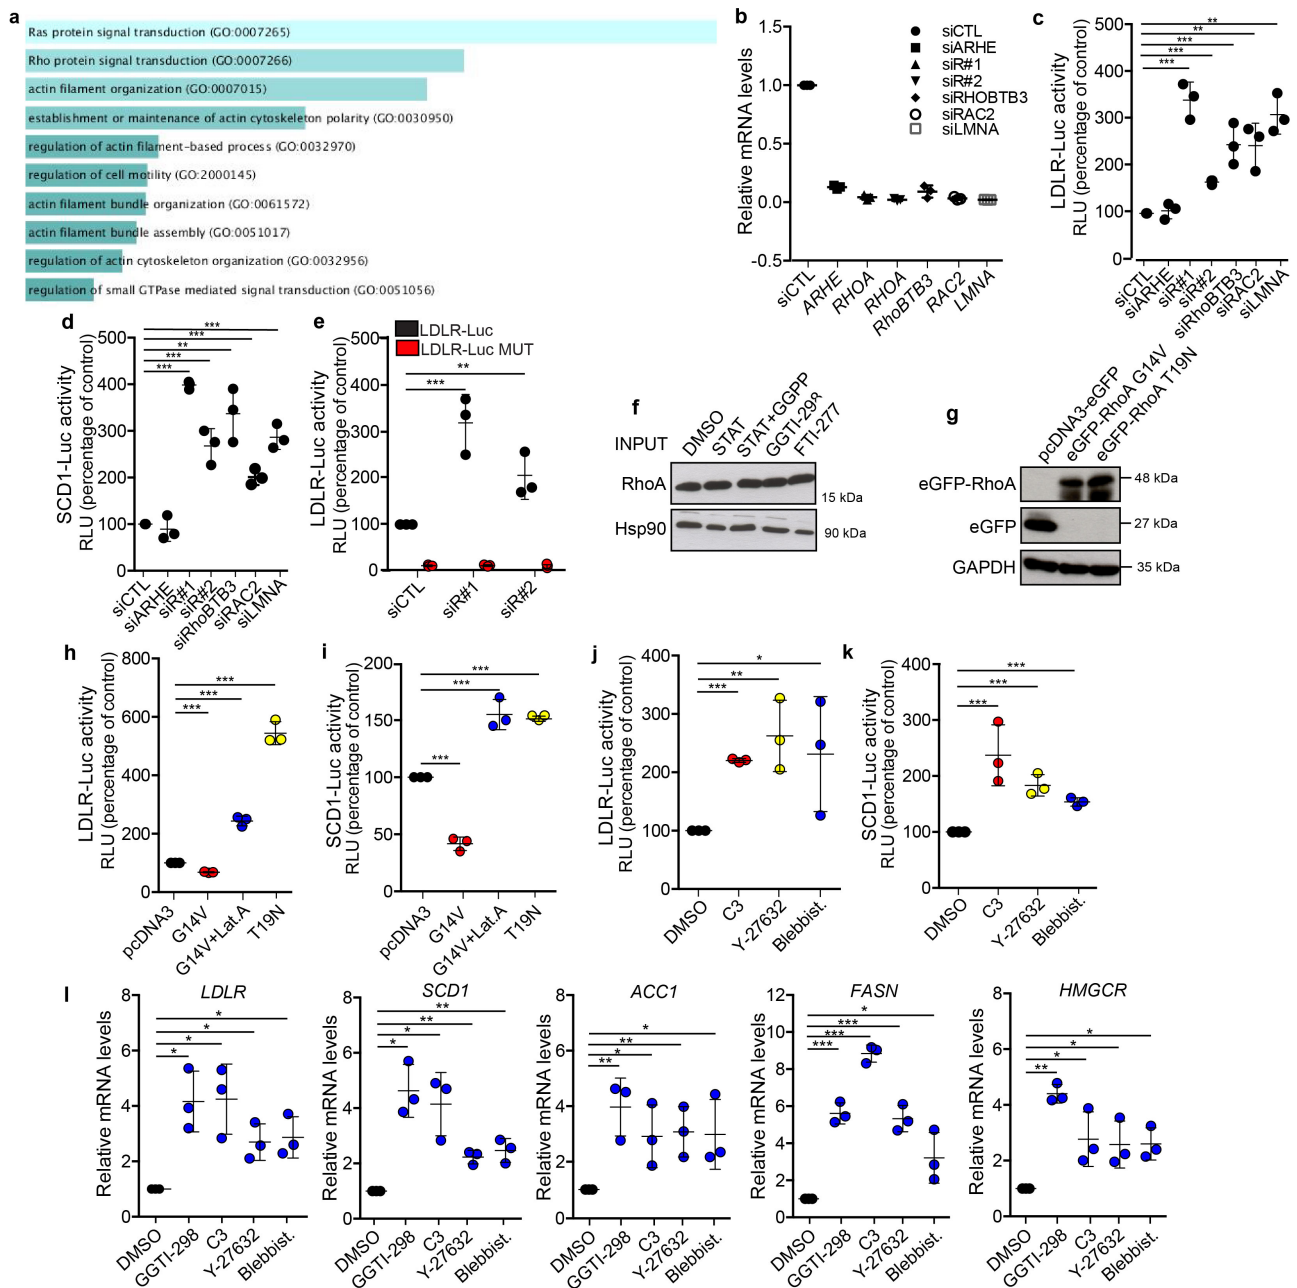

**Supplementary Fig. 2** | **a**, Gene ontology Biological Process categories that are significantly enriched in geranylgeranylated proteins that negatively regulate SREBP. **b**, *RhoE/AHRE*, *RhoA*, *RhoBTB3*, *Rac2* and *Lamin A* RT-qPCR in MDA-MB-231, 48h after transfection with control siRNA (siCTL) or siRNAs targeting *RhoE* (*siARHE*), *RhoA* (*siR#1* and *siR#2*), *RhoBTB3* (*siRHOBTB3*), *Rac2* (*siRAC2*) and *Lamin A* (*siLMNA*). **c**, LDLR-Luc assay in MDA-MB 231 cells transfected with siCTL siARHE, siRhoA#1, siRhoA#2, siRHOBTB3, siRAC2 or siLMNA. **d**, SCD1-Luc assay in MDA-MB 231 cells transfected with either siCTL siARHE, siRhoA#1, siRhoA#2, siRHOBTB3, siRAC2 or siLMNA. **e**, LDLR-Luc assay in IHH cells transfected with siCTL, siRhoA#1, or siRhoA#2. Cells transfected with the mutated construct LDLR-Luc MUT underwent the same treatments. **f**, Western blot analysis of



MCF-10A cells treated DMSO (as control), 1  $\mu$ M cerivastatin (STAT), 1  $\mu$ M cerivastatin and 20  $\mu$ M GGPP (STAT+GGPP), 5  $\mu$ M GGTI-298 or 5  $\mu$ M FTI-277. **g**, Western blot analysis of MCF-10A cells transfected with pcDNA3-eGFP, pcDNA3-eGFP-RhoA G14V and pcDNA3-eGFP-RhoA T19N. **h**, LDLR-Luc assay in IHH cells (**h**), SCD1-Luc assay in MCF-10A cells (**i**) 12 hours after transfection with pcDNA3-GFP control plasmid, pcDNA3-GFP-RhoA G14V construct with a 6 hours DMSO treatment, pcDNA3-GFP-RhoA G14V construct with a 6 hours Latrunculin A (G14V + Lat.A) treatment, or pcDNA3-GFP-RhoA T19N construct. **j, k, l**, LDLR-Luc assay in IHH cells (**j**), SCD1-Luc assay (**k**), *LDLR*, *SCD1*, *ACC1*, *FASN* and *HMGCR* RT-qPCR (**l**) in MCF-10A cells treated with DMSO (control), GGTI-298, C3, Y-27632 or Blebbistatin (Blebbist.) for 24 hours.

Graph bars represent mean  $\pm$  s.d. of n=3 biological replicates. Values in **c-e, h-k** are expressed as Relative Luminometer Units (RLU). RT-qPCR values are expressed as mRNA levels relative to control. Blots are representative of n=3 biological replicates. P value: \*P < 0.05, \*\*P < 0.01, \*\*\*P < 0.001 by two-tailed Student's t-test for all analyses. For western blots, GAPDH and Hsp90 were loading controls.

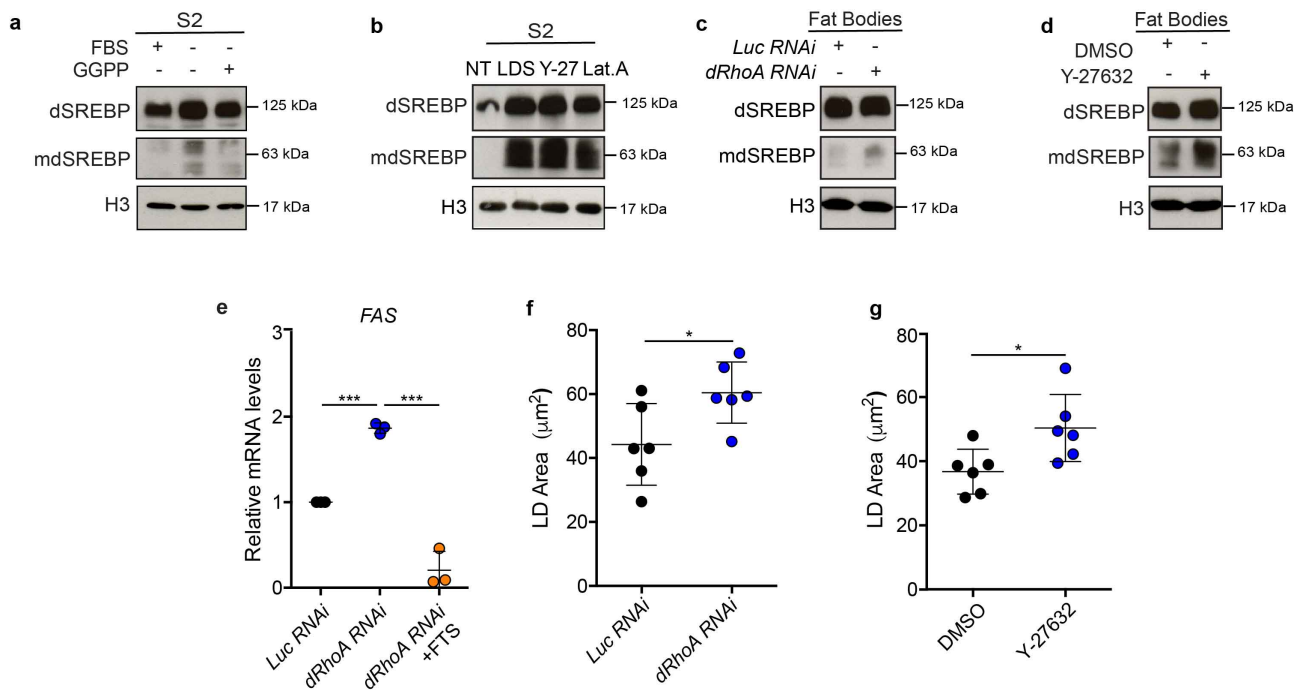

**Supplementary Fig. 3** | **a**, Western blot analysis of S2 *Drosophila* cells treated as follows: cell culture medium containing 10% foetal bovine serum (FBS) was replaced with serum-free medium or serum-free medium supplemented with GGPP. **b**, Western blot analysis of S2 *Drosophila* cells treated as follows: cell culture medium containing 10% FBS (non-treated, NT) was either replaced with medium containing 2% lipid serum (lipid-depleted serum, LDS), or supplemented with Y-27632 (Y27) or Latrunculin A (Lat.A). **c**, Western blot analysis of *Drosophila* larval fat bodies expressing *Luciferase RNAi* (*Luc*) or *dRhoA RNAi*. **d**, Western blot analysis of wild type *Drosophila* larval fat bodies treated with either DMSO or Y-27632 for 16 hours. **e**, RT-qPCR quantification of the expression of the *Fatty Acid Synthase* (*FAS*) dSREBP target gene in *Drosophila* larval fat bodies expressing *Luc RNAi* (as control, in black), *dRhoA RNAi* (in blue), or *dRhoA RNAi* and treated with fatostatin for 16 hours (FTS, in orange). Values are expressed as mRNA levels relative to control. Bars represent mean value  $\pm$  s.d. of n=3 biological replicates. *Rp49* was used as reference gene. **f**, Quantification of lipid droplet size in *Drosophila* larval fat bodies expressing *Luc RNAi* (as control, in black), *dRhoA RNAi* (in blue), or *dRhoA RNAi* and treated with fatostatin for 16 hours (FTS, in orange). Representative images are shown in Figure 2h. **g**, Quantification of lipid droplet size in wild type *Drosophila* larval fat bodies treated with either DMSO (in black) or Y-27632 (in blue). Representative images are shown in Fig. 2h. Graph bars represent mean value  $\pm$  s.d. of n=3 biological replicates (**e**) or n=6 individuals (**f** and **g**). For all western blots, H3 was used as loading control. Blots are representative of n=3 biological

replicates. For western blots, mSREBP indicates mature protein. P value: \*P < 0.05, \*\*\*P < 0.001 by two-tailed Student's t-test for all analyses.

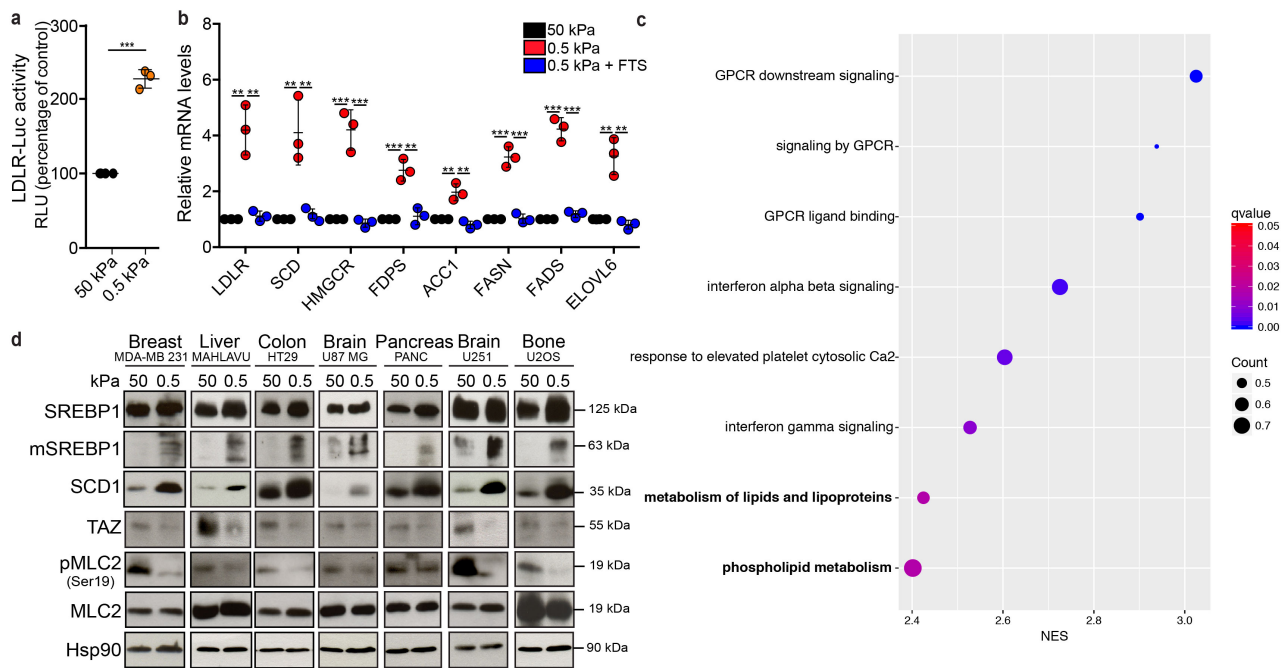

**Supplementary Fig. 4 | a**, Low density lipoprotein promoter-luciferase (LDLR-Luc) reporter assay in IHH cells cultured on either stiff (50 kPa elastic modulus, as control) or soft (0.5 kPa elastic modulus) fibronectin-coated hydrogel matrix for 24 hours. Graphs bars represent mean value  $\pm$  s.d. of  $n=3$  biological replicates. P value: \* $P < 0.001$  by two-tailed Student's t-test for all analyses. **b**, RT-qPCR quantification of the expression of the indicated genes in IHH cells cultured on either stiff (50 kPa elastic modulus, as control) or soft (0.5 kPa elastic modulus) fibronectin-coated hydrogel matrix, or soft fibronectin-coated hydrogel matrix with fatostatin treatment (FTS), for 24 hours. Graphs bars represent mean value  $\pm$  s.d. of  $n=3$  biological replicates. P value: \*\* $P < 0.01$ , \*\*\* $P < 0.001$  by two-tailed Student's t-test for all analyses. **c**, Reactome gene sets that are significantly enriched (FDR q value < 0.05) in MDA-MB-231 cells cultured on a soft substrate. Dot size represents the fraction of genes contributing to the enrichment score in each gene set (count); the positive normalized enrichment score (NES) indicates the degree to which Reactome gene sets are overrepresented in cells grown on the soft (as compared to cells grown on the stiff) substrate. Gene expression data were obtained from  $n=4$  biological replicates for each condition (GSE93529). **d**, Western blot analysis of cell lines originated from the indicated tissues, cultured on either stiff (50 kPa elastic modulus) or soft (0.5 kPa elastic modulus) fibronectin-coated hydrogel matrix for 24 hours. Hsp90 was used as loading control. Blots are representative of  $n=3$  biological replicates. mSREBP indicates mature protein.

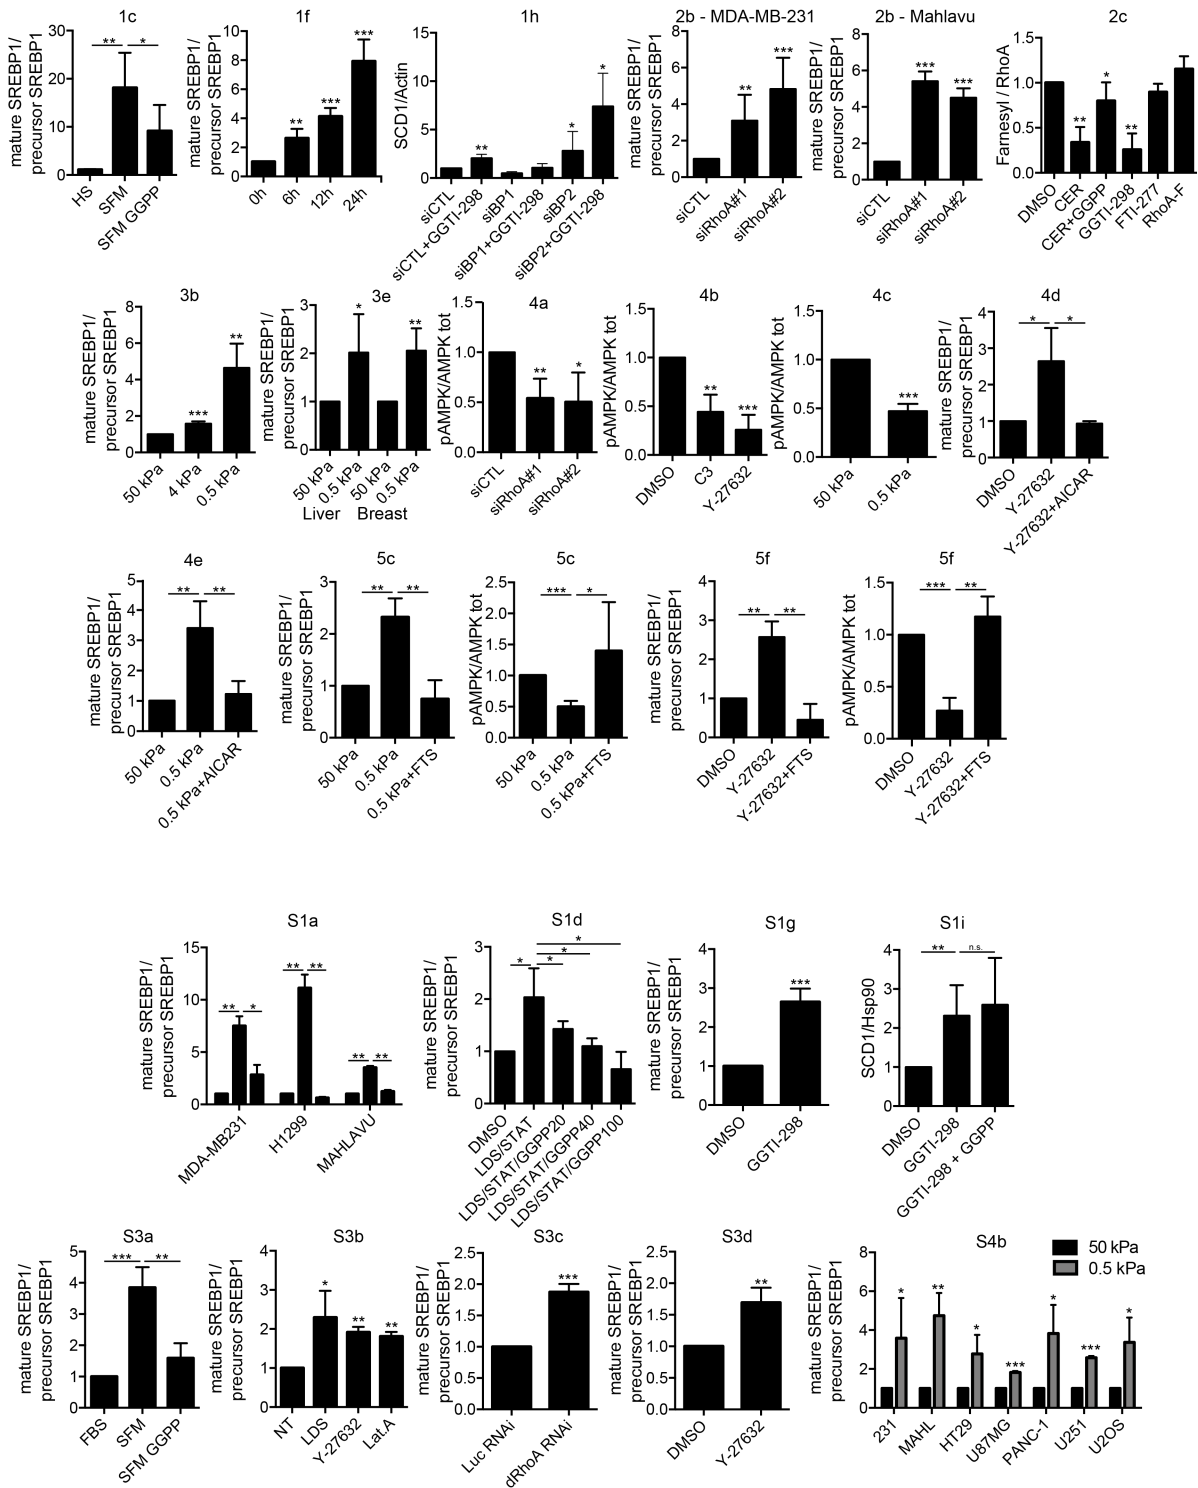

**Supplementary Fig. 5 |** Quantification of immunoblots shown in Fig.1 -5 and Supplementary Fig.1-

4. \* $P \leq 0.05$ , \*\* $P < 0.01$ , \*\*\* $P < 0.001$  by two-tailed Student's t-test.

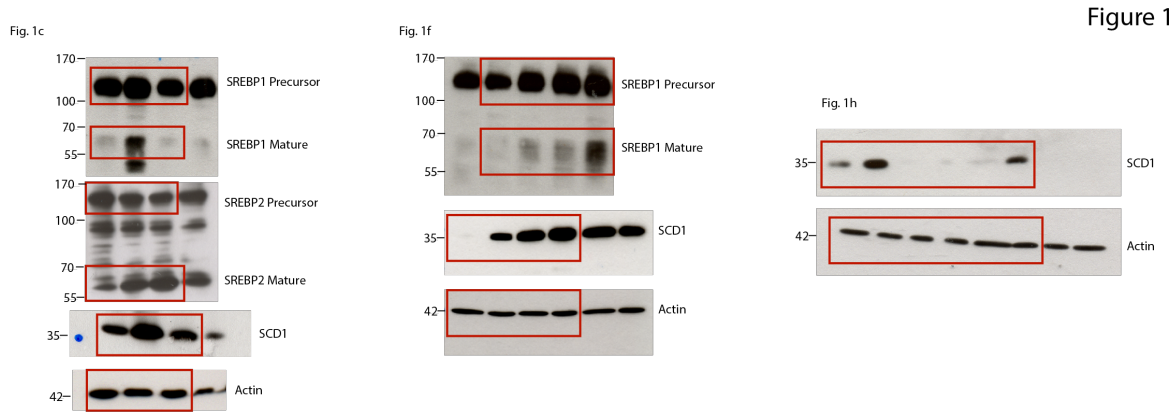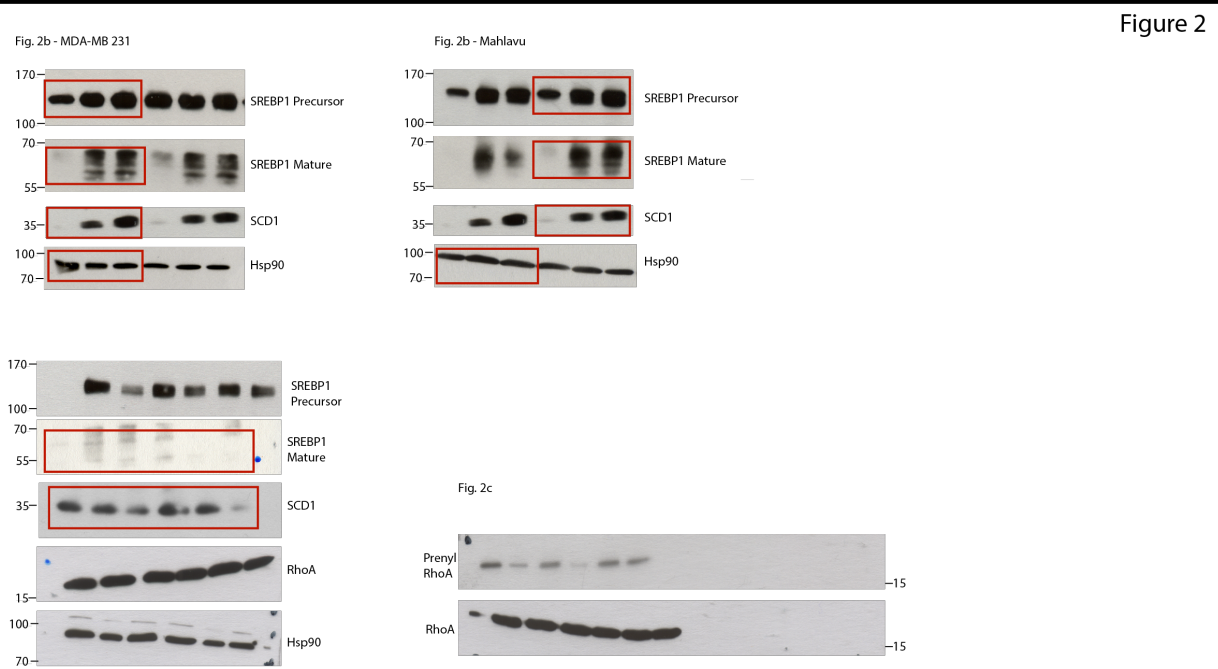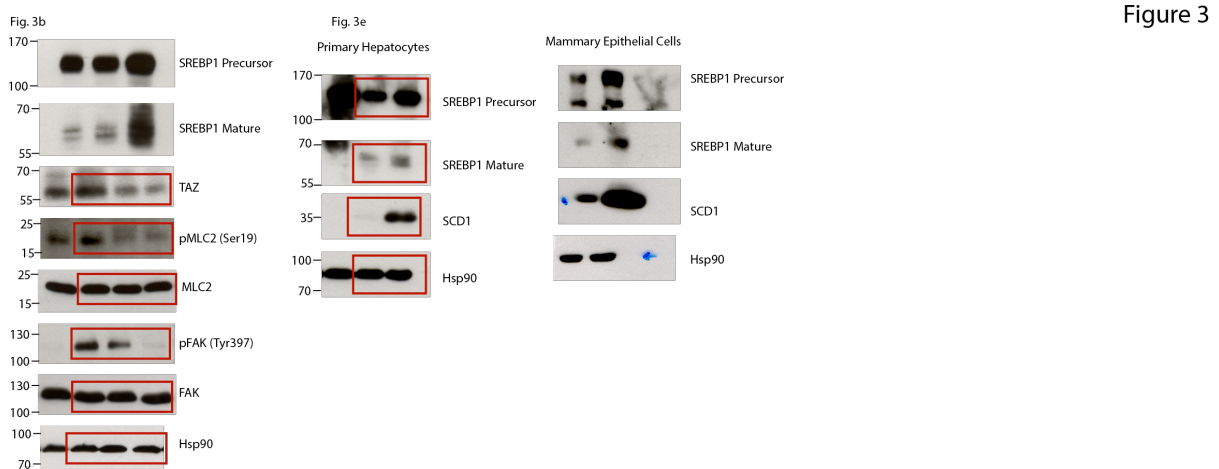

Supplementary Fig. 6 | Uncropped blots from Fig. 1, 2, 3, 4, 5 and Supplementary Fig. 1, 2, 3 and 4.

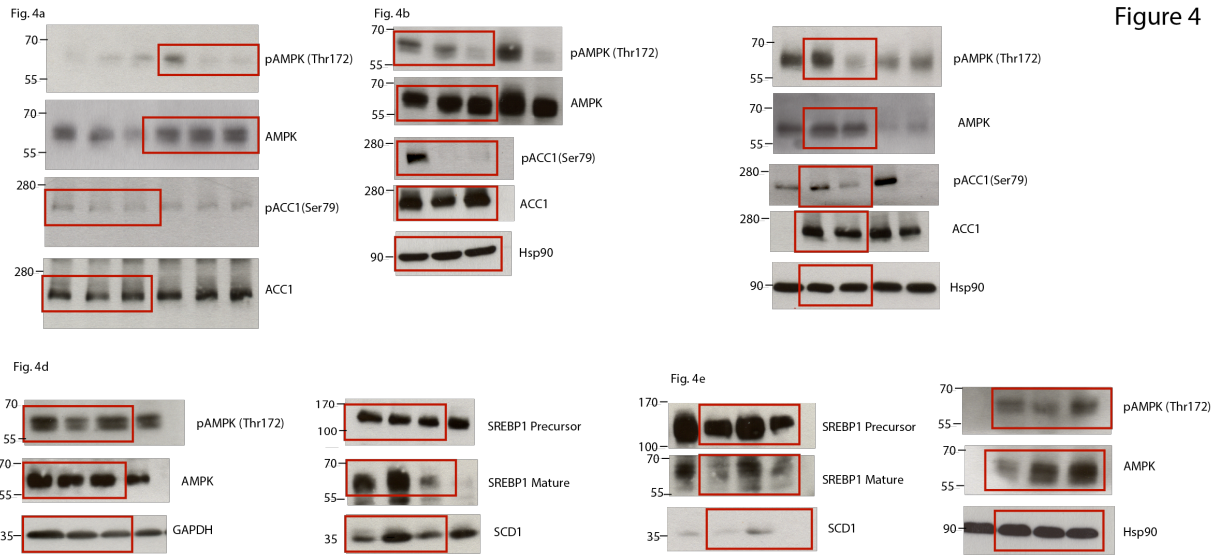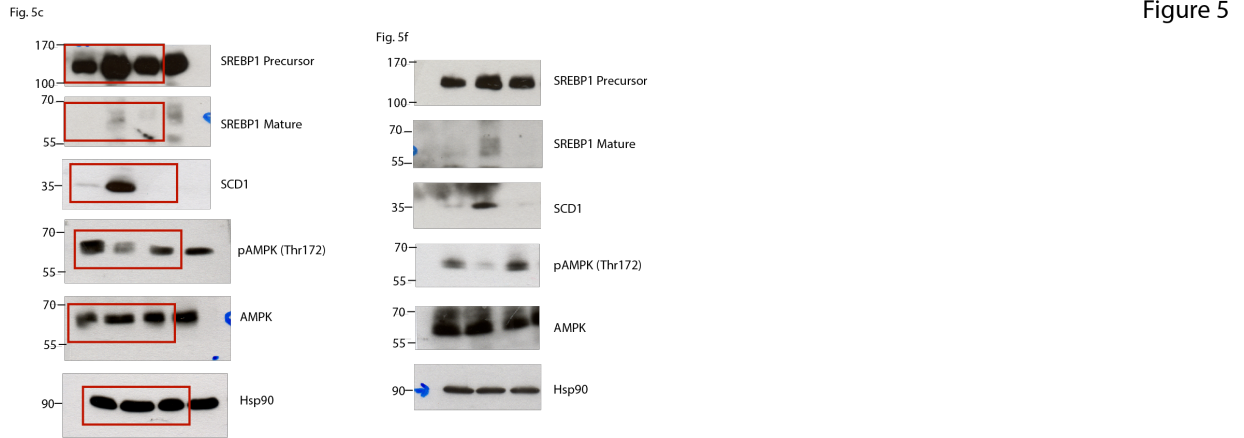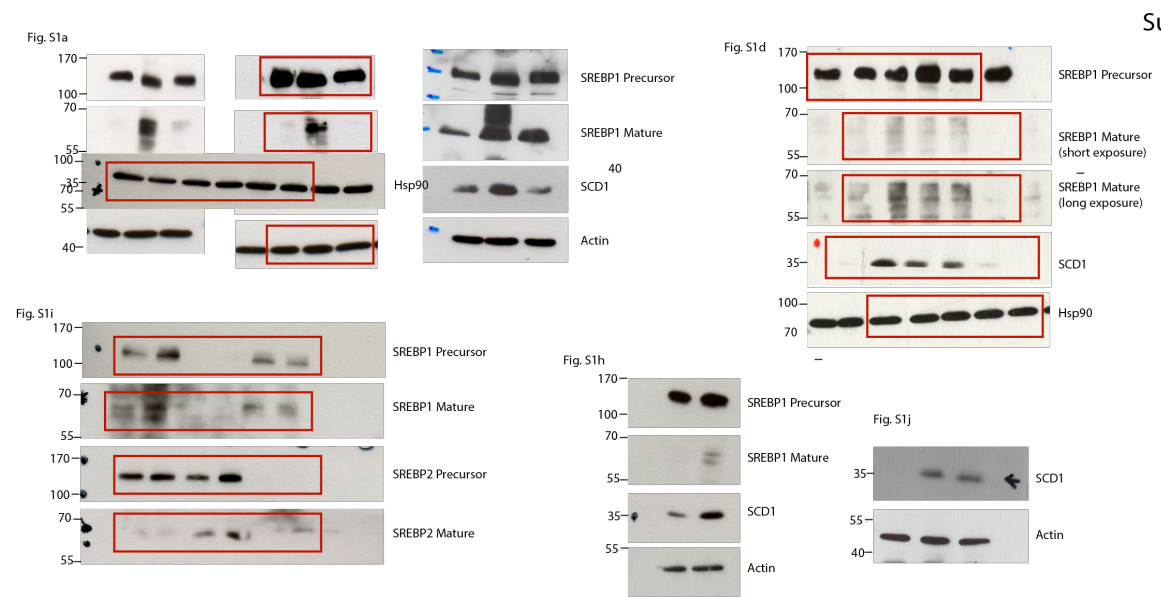



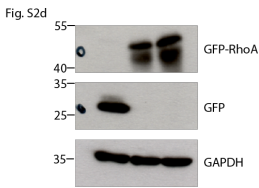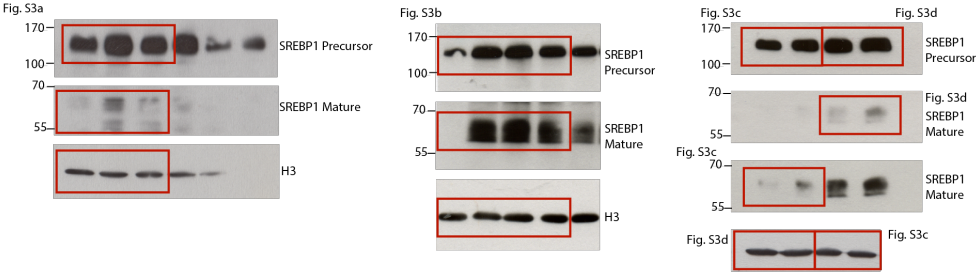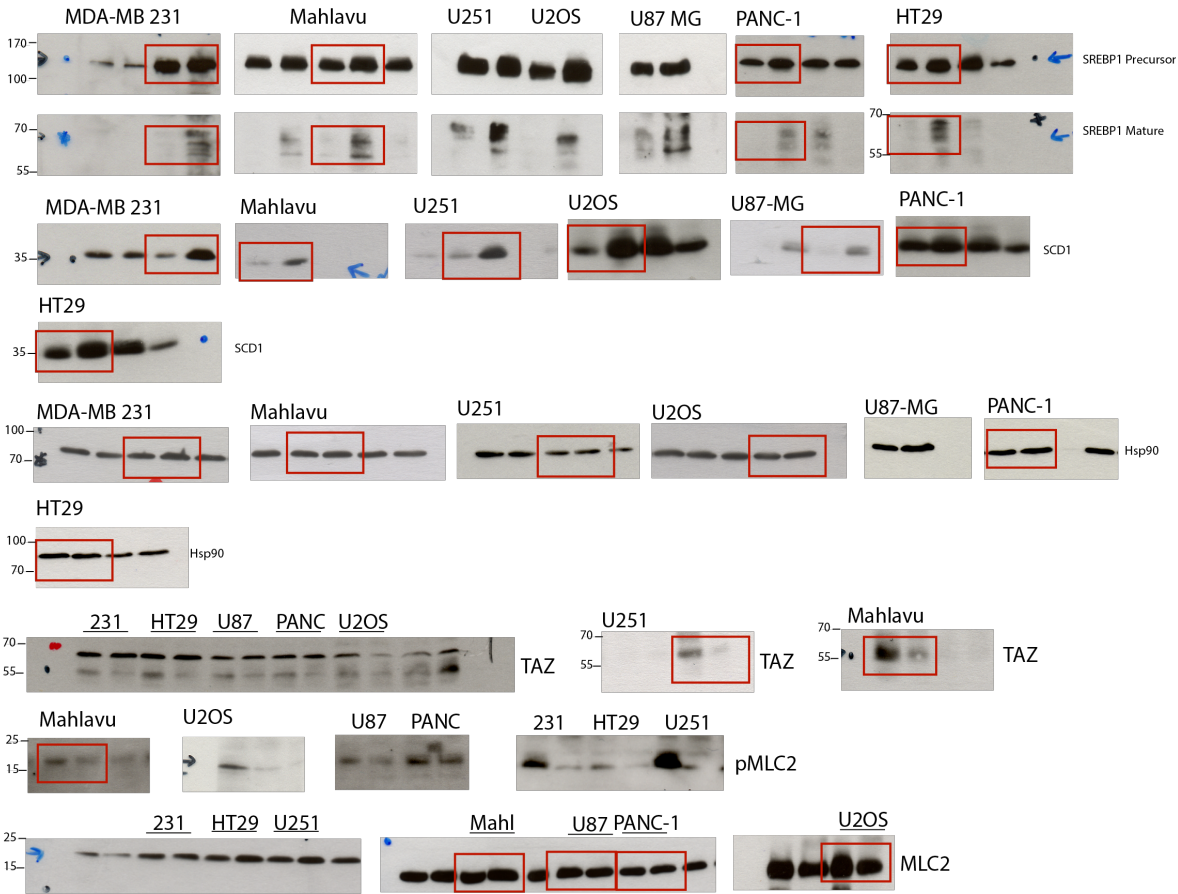

Supplementary Fig. 6 | Continued.



## Supplementary tables

**Supplementary Table 1 | List of siRNAs sequences used**

|               |           |                       |
|---------------|-----------|-----------------------|
| Human SREBP1  | siSREBP-1 | AUCUCUGAAGGAUCUGGUG   |
| Human SREBP2  | siSREBP-2 | GCCCUCUAUUGGAUGAUGC   |
| Human RhoA    | siRhoA#1  | AUGGAAAGCAGGUAGAGUU   |
| Human RhoA    | siRhoA#2  | GAAAGACAUGCUUGCUCAU   |
| Human ARHE    | siARHE    | UAGUAGAGCUCUCCAAUCACA |
| Human RhoBTB3 | siRhoBTB3 | AGGAAGAAGUUGAAAGAUUUU |
| Human RAC2    | siRAC2    | CCUCUUUUGGAACAACAUA   |
| Human LMNA    | siLMNA    | GGAUGAGGAUGGAGAUGAC   |

**Supplementary table 2 | List of primers used for qRT-PCR**

|                               |    |                                |
|-------------------------------|----|--------------------------------|
| human <i>LDLR</i>             | Fw | AAGCCATTCACTTCCCCAATC          |
|                               | Rv | GCCTCACCGTGCATGTTTTA           |
| human <i>SCD1</i>             | Fw | CACTTGGGAGCCCTGTATGG           |
|                               | Rv | TGAGCTCCTGCTGTTATGCC           |
| human <i>HMGCR</i>            | Fw | GGACCCCTTTGCTTAGATGAAA         |
|                               | Rv | CCACCAAGACCTATTGCTCTG          |
| human <i>FDPS</i>             | Fw | CTTCCTATAGCTGCAGCCATGTAC       |
|                               | Rv | GCATTGGCGTGCTCCTTCT            |
| human <i>ACC1</i>             | Fw | CATATTGAGGATGACAGGCTGG         |
|                               | Rv | CTCATAGTTGACCTGCTTTCTG         |
| human <i>FASN</i>             | Fw | CATCCAGATAGGCCTCATAGA          |
|                               | Rv | CTCCATGAAGTAGGAGTGGAA          |
| human <i>FADS1</i>            | Fw | GCTACTTCACCTGGGACGAG           |
|                               | Rv | GTGGAAGGCCACAAAGGGAT           |
| human <i>ELOVL6</i>           | Fw | CTCGAAATCAAGCGCTTTACAGA        |
|                               | Rv | AGGCAGCATAACAGAGCAGAAA         |
| human <i>RhoA</i>             | Fw | ATTCGTTGCCTGAGCAATGG           |
|                               | Rv | TGTGTCCCACAAAGCCAAC            |
| human <i>ARHE</i>             | Fw | GCCAGCCAGAAATTATCCAGC          |
|                               | Rv | CTTGCGAAGACATGGAGC             |
| human <i>RHOBTB3</i>          | Fw | ACTCCACAGCCTTGATGACTT          |
|                               | Rv | AAGCACCTGGTTGTTCAAGTT          |
| human <i>RAC2</i>             | Fw | CGCCAAGTGGTTCCCAGAAG           |
|                               | Rv | AGCTGAGCACTCCAGGTATTT          |
| human <i>H3</i>               | Fw | GTGAAGAAACCTCATCGTTACAGGCCTGGT |
|                               | Rv | CTGCAAAGCACCAATAGCTGCACTCTGGAA |
|                               |    |                                |
| mouse <i>Pparg</i>            | Fw | AAGAGCTGACCCAATGGTTG           |
|                               | Rv | ACCCTTGCATCCTTCACAAG           |
| mouse <i>AdipoQ</i>           | Fw | GACAAGGCCGTTCTTTACAC           |
|                               | Rv | CAGACTTGGTCTCCACCTC            |
| mouse <i>Cebpa</i>            | Fw | GAACAGCAACGAGTACCGGGTA         |
|                               | Rv | GCCATGGCCTTGACCAAGGAG          |
| mouse <i>Fabp4</i>            | Fw | AAGTGGGAGTGGGCTTTGC            |
|                               | Rv | CCGGATGGTGACCAAATCC            |
| mouse <i>Gapdh</i>            | Fw | ATCCTGCACCACCAACTGCT           |
|                               | Rv | GGGCCATCCACAGTCTTCTG           |
|                               |    |                                |
| <i>Drosophila</i> <i>FAS</i>  | Fw | CCCCAGGAGGTGAACTCTATCA         |
|                               | Rv | GACTTGACCGATCCGATCAAC          |
| <i>Drosophila</i> <i>Rp49</i> | Fw | ATCGTTACGGATCGAACAA            |

|                        |    |                        |
|------------------------|----|------------------------|
|                        | Rv | GACAATCACCTTGCGCTTCT   |
| <i>Drosophila RhoA</i> | Fw | GTGGATGGCAAACAGGTGGAGC |
|                        | Rv | GCGAATCGGGTGAATCCAAGAG |

**Supplementary table 3 | List of proteins that negatively regulate LDLR-Luc upon siRNA silencing**

| <b>Protein Name</b> | <b>Gene ID</b> | <b>Fluc/Rluc, fold over siCTL</b> |
|---------------------|----------------|-----------------------------------|
| ARHE                | 390            | 9,446                             |
| RHOA                | 387            | 8,590                             |
| RHOBTB3             | 22836          | 8,568                             |
| RAC2                | 5880           | 6,500                             |
| LMNA                | 4000           | 5,802                             |
| KIAA1164            | 54629          | 5,448                             |
| RHOB                | 388            | 5,253                             |
| FLJ23878            | 200172         | 4,339                             |
| GNG13               | 51764          | 4,264                             |
| RAP1A               | 5906           | 4,136                             |
| UBL3                | 5412           | 4,083                             |
| FLJ11280            | 55793          | 4,013                             |
| LMNB2               | 84823          | 3,898                             |
| RHOJ                | 57381          | 3,551                             |
| GBP5                | 115362         | 3,345                             |
| MRAS                | 22808          | 3,126                             |
| RHOG                | 391            | 3,003                             |
| PALM2               | 114299         | 2,898                             |
| ARHN                | 8153           | 2,757                             |
| MPI                 | 4351           | 2,637                             |
| MGC42105            | 167359         | 2,620                             |
| GNG2                | 54331          | 2,448                             |
| YKT6                | 10652          | 2,437                             |
| BC008967            | 89927          | 2,413                             |
| RAC3                | 5881           | 2,404                             |
| GBP2                | 2634           | 2,324                             |
| OAS1                | 4938           | 2,113                             |
| GNG7                | 2788           | 2,063                             |
| GNG10               | 2790           | 2,034                             |
| LMNB1               | 4001           | 1,986                             |
| PEX19               | 5824           | 1,984                             |
| DIRAS1              | 148252         | 1,875                             |
| RASL10B             | 91608          | 1,815                             |
| FBXL20              | 84961          | 1,755                             |
| RHOF                | 54509          | 1,752                             |
| GNG12               | 55970          | 1,700                             |

|          |        |       |
|----------|--------|-------|
| PPP1R16A | 84988  | 1,615 |
| RAB8A    | 4218   | 1,477 |
| GNG3     | 2785   | 1,464 |
| C10ORF25 | 220979 | 1,429 |
| RHOC     | 389    | 1,425 |
| RRAS     | 6237   | 1,410 |
| RPGR     | 6103   | 1,405 |
| GNG4     | 2786   | 1,398 |
| RAB18    | 22931  | 1,392 |
| PDE6B    | 5158   | 1,375 |
| RAP1B    | 5908   | 1,332 |
| CPLX4    | 339302 | 1,286 |
| RAC1     | 5879   | 1,202 |
| RAB8B    | 51762  | 1,152 |
| PTP4A3   | 11156  | 1,132 |
| FBXO10   | 26267  | 1,119 |
| CAMK1G   | 57172  | 0,976 |
| KRAS2    | 3845   | 0,957 |
| C17ORF37 | 84299  | 0,865 |
| RRAS2    | 22800  | 0,755 |
| RALB     | 5899   | 0,755 |
| RNF208   | 727800 | 0,754 |
| NRAS     | 4893   | 0,743 |
| DIRAS2   | 54769  | 0,726 |
| GRK7     | 131890 | 0,702 |
| ARHI     | 9077   | 0,667 |
| RRP22    | 10633  | 0,627 |
| GNG8     | 94235  | 0,606 |
| CPLX3    | 594855 | 0,501 |
| RND1     | 27289  | 0,498 |
| FBXL2    | 25827  | 0,495 |
| RHEB     | 6009   | 0,486 |
| CNP      | 1267   | 0,469 |
| RAP2B    | 5912   | 0,430 |
| CDC42    | 998    | 0,394 |
| DNAJB2   | 3300   | 0,287 |
| RALA     | 5898   | 0,234 |
| PALM     | 5064   | 0,189 |

**Supplementary table 4 | SREBP1 gene signature generated for human samples validation.**

|        |         |       |       |
|--------|---------|-------|-------|
| ACACB  | ACSL4   | ACSL5 | CSAD  |
| ECHDC1 | EHHADH  | FADS1 | FADS2 |
| GPAM   | GSTM1   | GSTT1 | IGHM  |
| PDK1   | RARRES1 | SCD   | THSRP |
